# Supplementary material
Source: PubMed Central journal article supplement (PMC516634)
Supplement: 7600362s3.pdf [file 7600362s3.pdf]

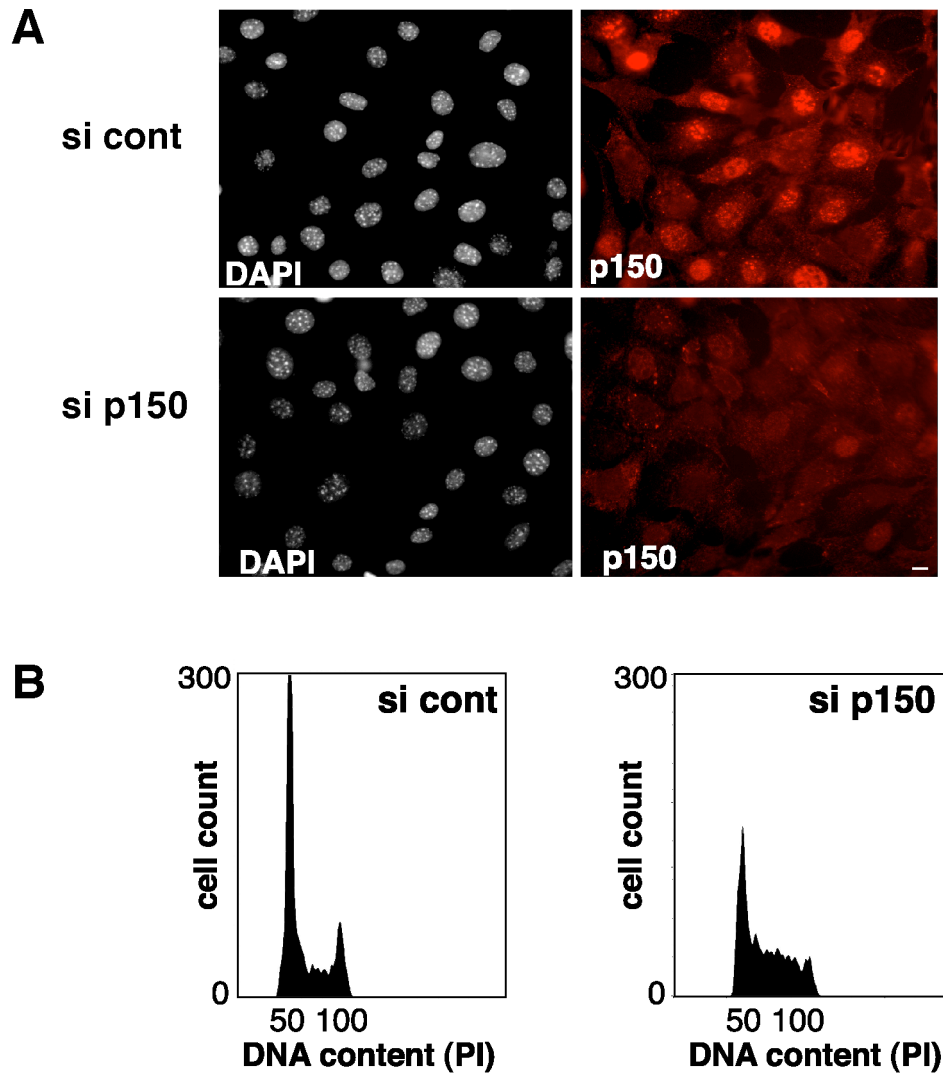

**Figure S3. Efficient p150CAF-1 knockdown using siRNA in 3T3 cells.**

**A)** 3T3 cells Knocked-down for p150CAF-1. SiRNA treated cells with control (si cont, top) or siRNA against p150 (si p150, bottom), and stained with DAPI (left) and p150 (right). Scale bar is 10 mm.

**B)** Loss of p150CAF-1 leads to accumulation in S-phase. FACS analysis of 3T3cells transfected with siRNA control (si cont, left) or siRNA against p150 (si p150, right).
